# Supplementary material for: High-Quality Masks Reduce COVID-19 Infections and Deaths in the US
Source: bioRxiv or medRxiv preprint supplement (doi:10.1101/2020.09.27.20199737), 2021-01-28
Supplement: Supplementary file [file 2020.09.27.20199737-1.pdf]

## Supplement for Online: Data Sources and Disease Model

Authors: Erik Rosenstrom, Buse Eylul Oruc, Julie Ivy, Pinar Keskinocak, Maria E. Mayorga, Julie L. Swann, PhD

In this document we provide additional information on the model used to project the spread of Covid-19 disease. The model was based on the structures of ones previously published for influenza pandemics (1-3) and for Covid-19 (4).

### Agent-Based Network

Figure S1 summarizes the structure of agents across the network. Data values to generate individual agents were drawn from the US Census at the census tract including age in five categories (age 0 to 4; age 5 to 9; age 10 to 19; age 20 to 64; age 65 and greater) (5). A household was determined to have children present or not (5, 6), and agents were assigned to households according to the distribution of household size in the tract (5); households were assigned. All agents interacted with households at night. During the day, all agents 5 to 19 were allowed interactions in peer groups (“schools”), and agents 19 to 64 interacted in peer groups (“work”) according to commuting patterns. The latter was determined from workflow data (7) indicating the people who live in a census tract and the percentage who work in each of the other census tracts. The model used more than one million agents to represent a state-wide population approximately ten times that size.

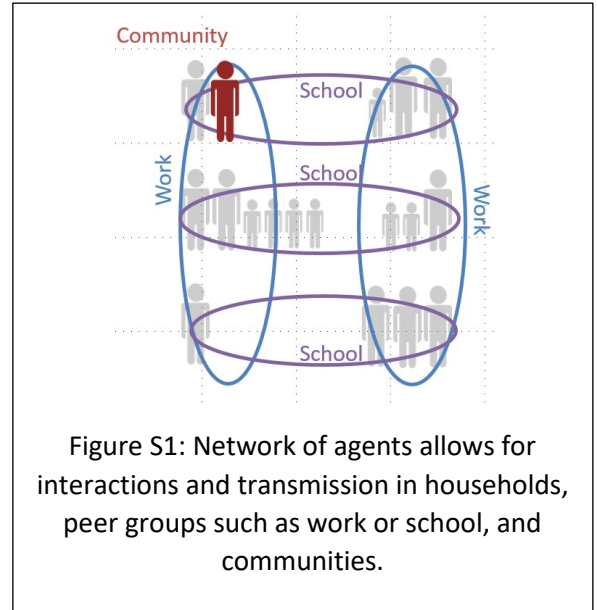

Figure S1: Network of agents allows for interactions and transmission in households, peer groups such as work or school, and communities.

### Disease Progression within an Individual

The underlying model of disease spread was assumed to be a variant of a Susceptible-Exposed-Infectious-Recovered (SEIR) model; see Figure S2. At a given point in time, each individual is in exactly one state: susceptible (S), exposed (E), pre-symptomatic (IP), asymptomatic (IA), symptomatic (IS), hospitalized (H), recovered (R), or dead (D).

The full details of the model are available in Keskinocak et al (4) in the supplemental document. A portion of the material in that document is summarized in this subsection.

The states in the disease progression model include Susceptible (S), Exposed (E), Infectious Pre-symptomatic (IP), Infectious Asymptomatic (IA), Infectious Symptomatic (IS), Hospitalized (H), Recovered (R), and Dead (D). An individual is in exactly one state at a time, and all individuals begin as susceptible.

The list of input parameters and associated references is provided in Table S1. Additional details are available in the supplements of Ekici et al (2) and Keskinocak et al (4).

Several parameters determine the length of time within each state in the SEIR including the mean and standard deviation on the time

before an exposed patient becomes pre-symptomatic, the average length of time of the pre-symptomatic phase, the distribution of time within the symptomatic (S) stage, the distribution of the length of hospitalization, and the ratio of the duration of the symptomatic and asymptomatic states. Parameters related to the transmission between states include the probability of moving to symptomatic (from IP), the probability of hospitalization (from IS), and the probability of death (from H); probabilities out of a state must sum to 100%. The overall infection fatality rate (i.e., the probability that an exposed person will die) as quantified from the simulation of transitions is approximately 0.46.

The infectivity of the virus at the beginning of the outbreak without interventions is summarized by reproductive rate  $R_0$ , and the transmission rate (denoted as  $\beta$ ). The proportion of transmissions that occur at either the IP or IA stage is  $\theta$ , and the proportion of infections generated by individuals who are never symptomatic is  $\omega$ . In the absence of interventions, the proportion of transmission that occurs outside households is  $\gamma$ , and the proportion of transmission outside households that occur in the community is  $\delta$ .

One of the important differences in comparison to the values used for influenza (2), is that the proportion of transmissions that can occur by people without symptoms is much higher. In comparison to the values used for the state of Georgia (4),  $\delta$  is a little higher. For this paper we also take the import rate of cases to be lower (45 compared to 100) based on factors such as the airport size, commuting in or out of the state, etc.

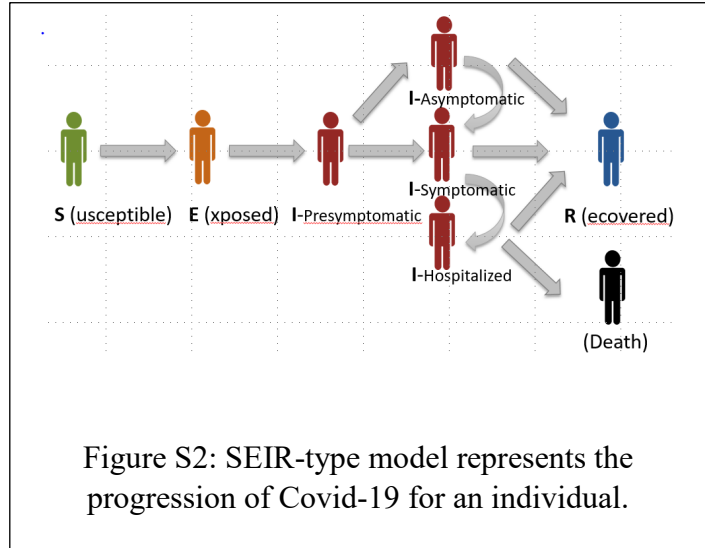

Figure S2: SEIR-type model represents the progression of Covid-19 for an individual.

Table S1: Displays key model parameters and references. Many parameters are also summarized in the supplemental material of Keskinocak et al (4).

| PARAMETER                                                                      | ESTIMATES                                                      | REFERENCES                                           |
|--------------------------------------------------------------------------------|----------------------------------------------------------------|------------------------------------------------------|
| Exposed (E) Duration                                                           | Weibull with mean 4.6 days                                     | (8, 9)                                               |
| Pre-symptomatic (IP) Duration                                                  | 0.5 days                                                       | (8)                                                  |
| Hospitalized (H) Duration                                                      | Exponential with mean 10.4 days                                | (8, 10)                                              |
| Symptomatic (S) Duration                                                       | Exponential with mean 2.9 days                                 | (11)                                                 |
| Symptomatic-Asymptomatic Duration Ratio                                        | 1.5                                                            | (8)                                                  |
| Probability of Symptomatic (from IP)                                           | 0.50-0.82                                                      | (12)<br>(13-16)                                      |
| Probability of Hospitalization (from IS)                                       | 0.016 for age 0-19;<br>0.18 for age 20-64;<br>0.30 for age 65+ | (17)                                                 |
| Probability of Death (from H)                                                  | 0 for age 0-19;<br>0.0515 for age 20-64;<br>0.3512 for age 65+ | (17)                                                 |
| R0                                                                             | 2.4                                                            | (18-20)                                              |
| $\beta$ transmission rate                                                      | 1.12                                                           | (18)                                                 |
| $\theta$ (probability IP to IA)                                                | 0.48                                                           | (21)                                                 |
| $\omega$ (proportion infections by IA)                                         | 0.24                                                           | (21)                                                 |
| $\gamma$ (proportion of transmission that occur outside households)            | 30%                                                            | (2, 4)                                               |
| $\delta$ (proportion of infections outside households that occur in community) | 0.23                                                           | (4); Calibration                                     |
| FlatImportRate                                                                 | 45                                                             | (4); Calibration                                     |
| Infection Fatality Rate                                                        | 0.46%                                                          | Results from model transitions with other parameters |

## Stochastic Simulation across Network

To seed infections in agents, the confirmed cases at the county level over time were collected from data hosted by The New York Times (22). Infections were assigned to census tracts randomly according to the population within each tract in the county using the Huntington-Hill method. For validation, data was also collected on deaths (The New York Times) and hospitalizations (23).

For each scenario, 15 replications of the simulation are run. The primary sources of randomness for these simulations include four types: (i) the structure of network, i.e., the random assignment of agents to households and peer groups (ii) the individual agents who are infected with the seed infections; (iii) whether an infected individual will transmit the virus to another person in the household, peer group, and/or community at a point in time; and (iv) the duration within a disease state. The mean and standard deviation of the performance metrics are computed across the simulation replications.

## REFERENCES

1. Shi P, Keskinocak P, Swann JL, Lee BY. Modelling seasonality and viral mutation to predict the course of an influenza pandemic. *Epidemiology and Infection*. 2010;138(10):1472-81. doi: 10.1017/s0950268810000300. PubMed PMID: WOS:000282195900016.
2. Ekici A, Keskinocak P, Swann JL. Modeling Influenza Pandemic and Planning Food Distribution. *M&Som-Manufacturing & Service Operations Management*. 2014;16(1):11-27. doi: 10.1287/msom.2013.0460. PubMed PMID: WOS:000343747400002.
3. Shi PY, Keskinocak P, Swann JL, Lee BY. The impact of mass gatherings and holiday traveling on the course of an influenza pandemic: a computational model. *Bmc Public Health*. 2010;10. doi: 10.1186/1471-2458-10-778. PubMed PMID: WOS:000286276300001.
4. Keskinocak P, Oruc Aglar BE, Baxter A, Asplund J, Serban N. The Impact of Social Distancing on COVID19 Spread: State of Georgia Case Study. Forthcoming in *PLOS One*. 2020:2020.04.29.20084764. doi: 10.1101/2020.04.29.20084764 on MedRxiv
5. U.S. Census Bureau. American Community Survey 5-year Estimates 2017. Available from: data.census.gov.
6. U.S. Census Bureau. Census Summary File 1 2010. Available from: data.census.gov.
7. U.S. Census Bureau. Census Transportation Planning Products, 5-year data (2012-2016). Available from: data5.cttp.transportation.org.
8. Ferguson N, Laydon D, Nedjati-Gilani G, Imai N, Ainslie K, Baguelin M, et al. Impact of non-pharmaceutical interventions (NPIs) to reduce COVID19 mortality and healthcare demand. Imperial College of London, 2020 16 Mar. Report No.
9. Linton NM, Kobayashi T, Yang YC, Hayashi K, Akhmetzhanov AR, Jung SM, et al. Incubation Period and Other Epidemiological Characteristics of 2019 Novel Coronavirus Infections with Right Truncation: A Statistical Analysis of Publicly Available Case Data. *Journal of Clinical Medicine*. 2020;9(2). doi: 10.3390/jcm9020538. PubMed PMID: WOS:000518823000250.
10. Weitz JS, Beckett SJ, Coenen AR, Demory D, Dominguez-Mirazo M, Dushoff J, et al. Modeling shield immunity to reduce COVID-19 epidemic spread. *Nature Medicine*. 2020;26(6):849-+. doi: 10.1038/s41591-020-0895-3. PubMed PMID: WOS:000541166000025.
11. Riou J, Hauser A, Counotte M, Althaus C. Adjusted Age-Specific Case Fatality Ratio during the Covid-19 Epidemic in Hubei, China, January and February 2020. medRxiv. 2020; <https://doi.org/10.1101/2020.03.04.20031104>.

12. Mizumoto K, Kagaya K, Zarebski A, Chowell G. Estimating the asymptomatic proportion of coronavirus disease 2019 (COVID-19) cases on board the Diamond Princess cruise ship, Yokohama, Japan, 2020. *Eurosurveillance*. 2020;25(10):2-6. doi: 10.2807/1560-7917.Es.2020.25.10.2000180. PubMed PMID: WOS:000519988300001.
13. Andrei M. Iceland's testing suggests 50% of COVID-19 cases are asymptomatic 2020 [updated Mar 26 2020; cited 2020 Sept 21]. Available from: <https://www.zmescience.com/medicine/iceland-testing-covid-19-0523/>.
14. Day M. Covid-19: four fifths of cases are asymptomatic, China figures indicate. *Bmj-British Medical Journal*. 2020;369. doi: 10.1136/bmj.m1375. PubMed PMID: WOS:000523766900014.
15. Mandavilli A. Infected but Feeling Fine: The Unwitting Coronavirus Spreaders. *The New York Times*. 2020 Mar 31.
16. Nishiura H, Kobayashi T, Miyama T, Suzuki A, Jung S, Hayashi K, et al. Estimation of the asymptomatic ratio of novel coronavirus infections (COVID-19). *International Journal of Infectious Diseases*. 2020;94:154-5. doi: 10.1016/j.ijid.2020.03.020. PubMed PMID: WOS:000533643700036.
17. CDC Covid-Response Team. Severe Outcomes Among Patients with Coronavirus Disease 2019 (COVID-19) - United States, February 12-March 16, 2020. *Mmwr-Morbidity and Mortality Weekly Report*. 2020;69(12):343-6. doi: 10.15585/mmwr.mm6912e2. PubMed PMID: WOS:000536001200006.
18. Li RY, Pei S, Chen B, Song YM, Zhang T, Yang W, et al. Substantial undocumented infection facilitates the rapid dissemination of novel coronavirus (SARS-CoV-2). *Science*. 2020;368(6490):489-+. doi: 10.1126/science.abb3221. PubMed PMID: WOS:000531178400040.
19. Walker PGT, Whittaker C, Watson OJ, Baguelin M, Winskill P, Hamlet A, et al. The impact of COVID-19 and strategies for mitigation and suppression in low- and middle-income countries. *Science*. 2020;369(6502):413-+. doi: 10.1126/science.abc0035. PubMed PMID: WOS:000556265800040.
20. World Health Organization. Report of the WHO-China Joint Mission on Coronavirus Disease 2019 (COVID-19). World Health Organization, 2020 16-24 February 2020. Report No.
21. Ganyani T, Kremer C, Chen DX, Torneri A, Faes C, Wallinga J, et al. Estimating the generation interval for coronavirus disease (COVID-19) based on symptom onset data, March 2020. *Eurosurveillance*. 2020;25(17):12-9. doi: 10.2807/1560-7917.Es.2020.25.17.2000257. PubMed PMID: WOS:000530880200003.
22. The New York Times. Coronavirus in the U.S.: Latest Map and Case Count 2020 [cited 2020 18 Aug]. Available from: <https://www.nytimes.com/interactive/2020/us/coronavirus-us-cases.html>.
23. NC Department of Health and Human Services. COVID-19 North Carolina Dashboard - NC DHHS COVID-19 2020 [cited 2020 Sept 22]. Available from: <https://covid19.ncdhhs.gov/dashboard>.
